# Supplementary material
Source: publisher site journal article supplement (https://www.dovepress.com/article/469948)
Supplement: Supplementary file 1 [file get_supplementary_file.php]

**Supplementary Figure**

**
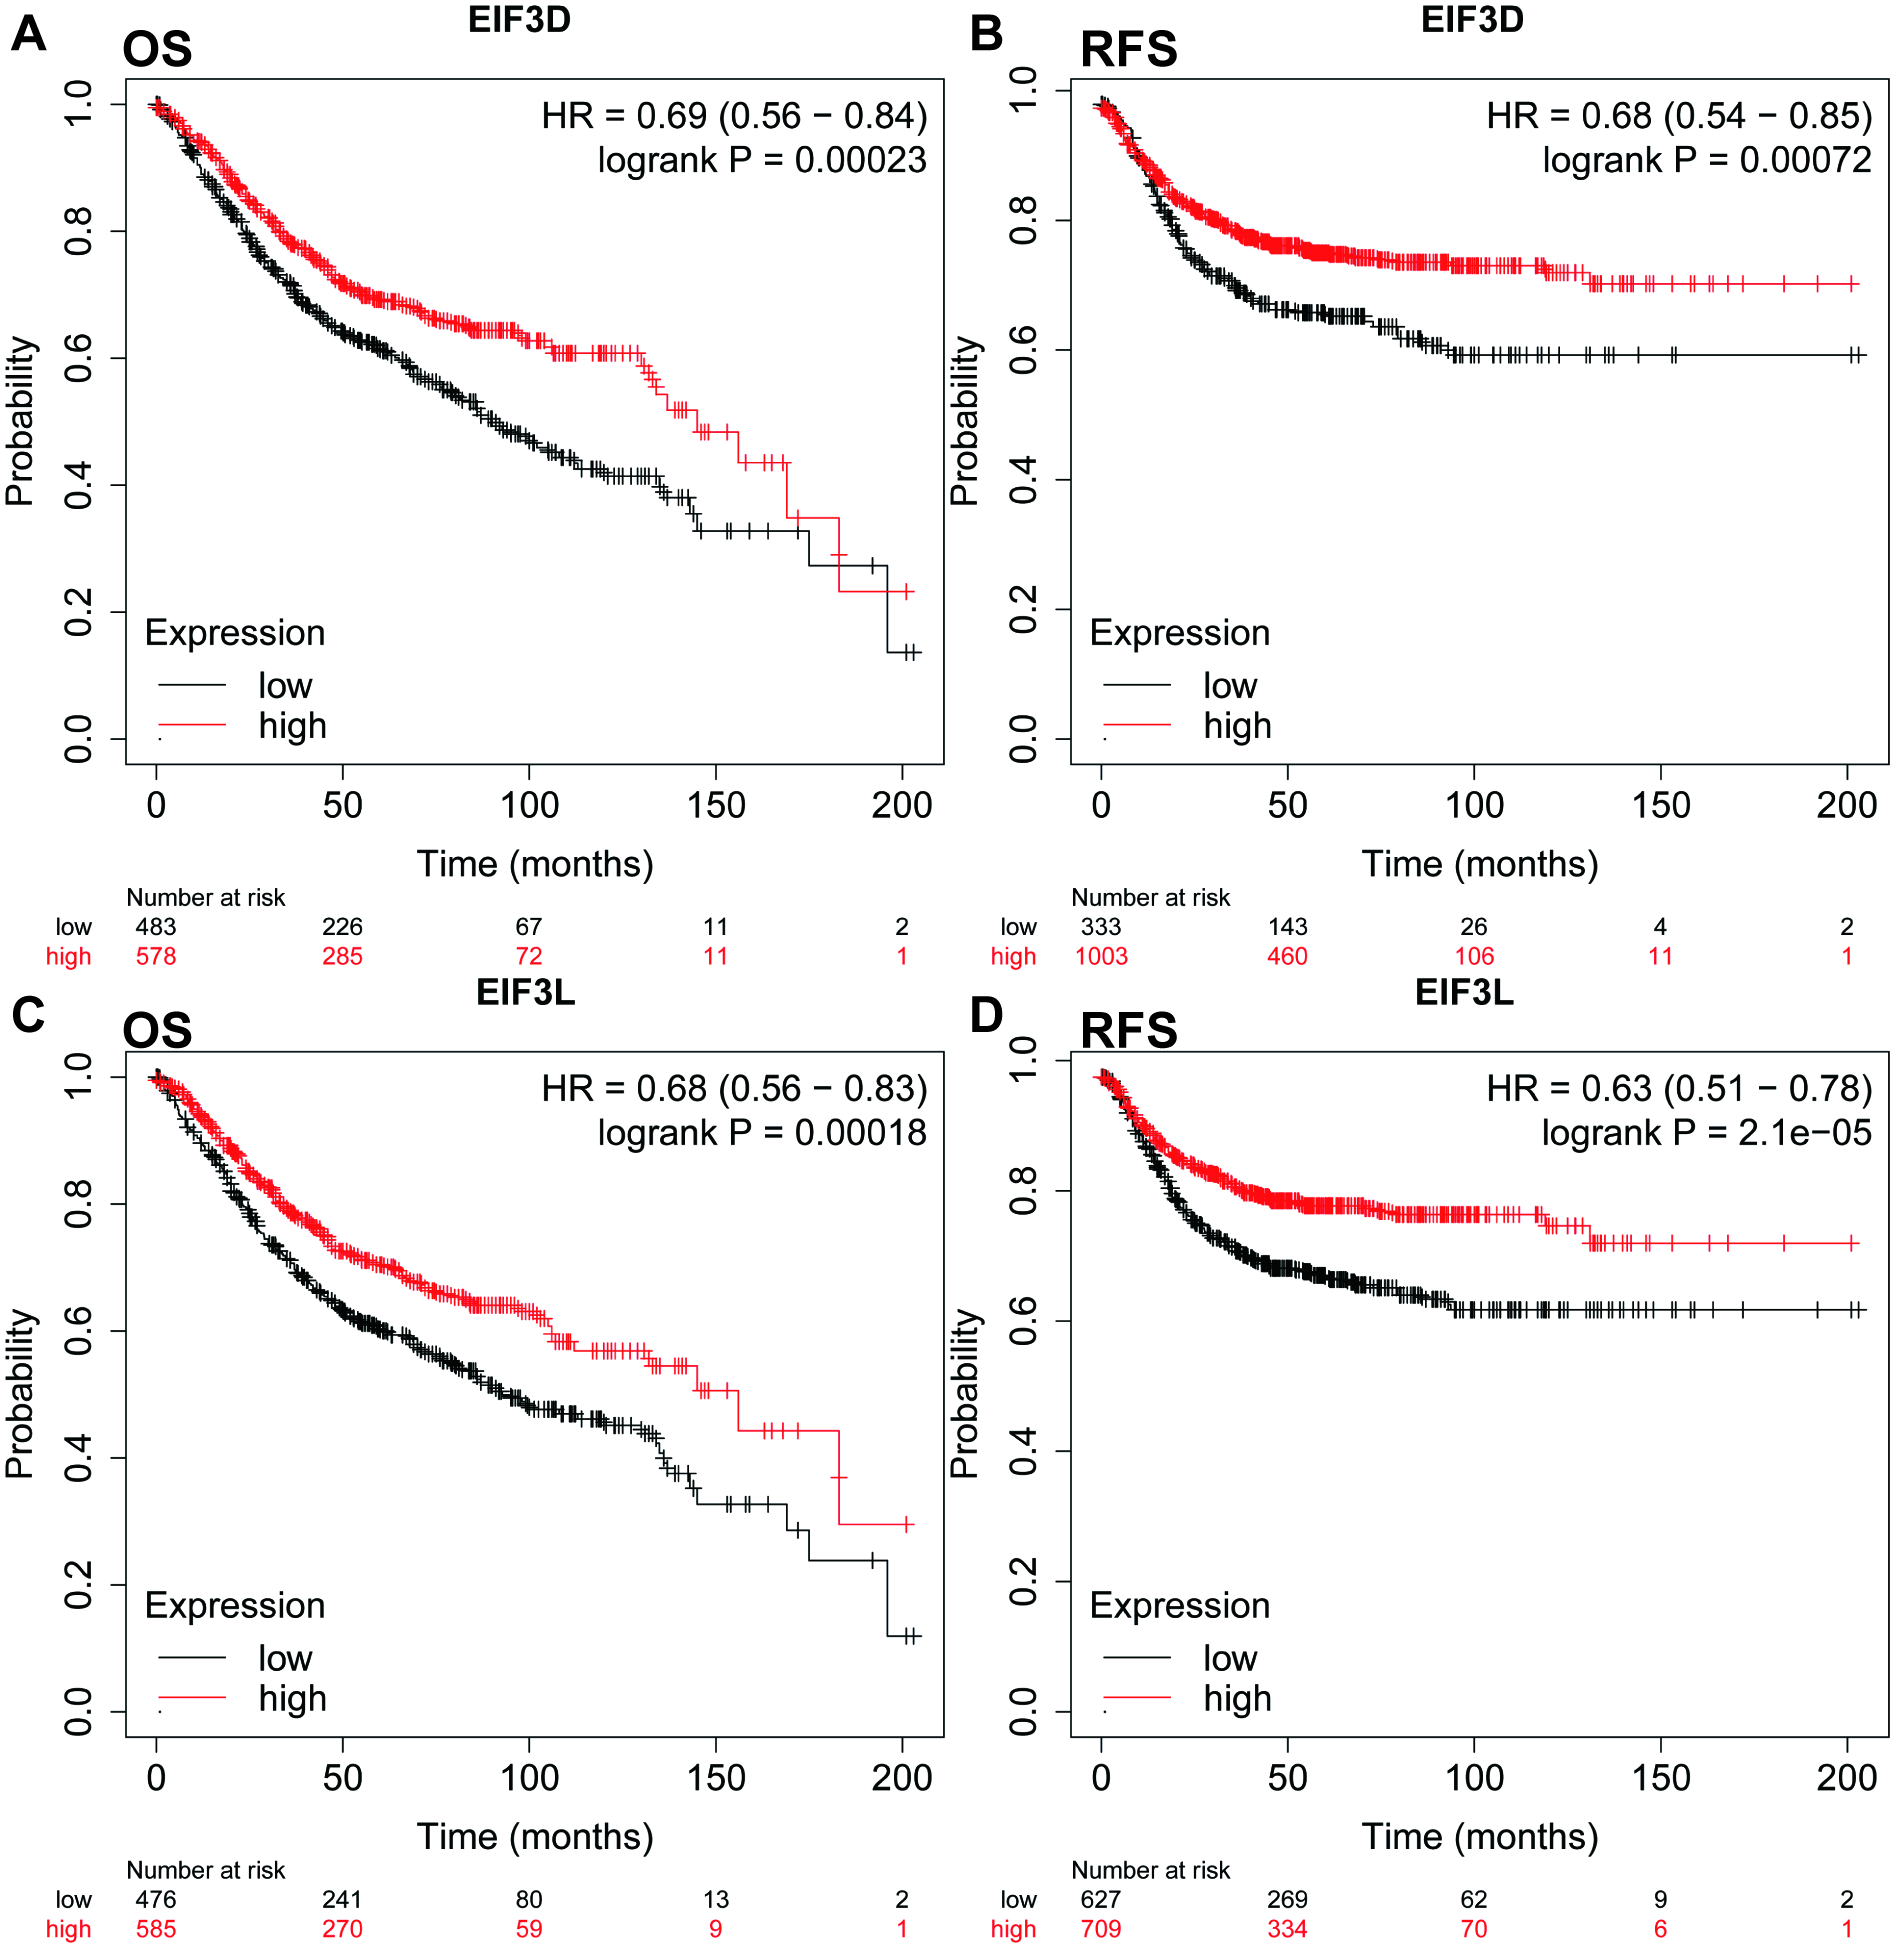
**

Figure S1. EIF3D and EIF3L are related to the prognosis of COAD. EIF3D correlated with worse OS (A) and RFS (B) in COAD patients. EIF3L were associated with poorer OS (C) and RFS (D) in patients with COAD.
